# Supplementary material
Source: PubMed Central journal article supplement (PMC10230510)
Supplement: NIHMS1894177-supplement-Appendix_1.pdf [file NIHMS1894177-supplement-Appendix_1.pdf]

# Patient Education Materials Assessment Tool for Printable Materials (PEMAT-P)

## How To Use the PEMAT To Assess a Material

There are seven steps to using the PEMAT to assess a patient education material. The instructions below assume that you will score the PEMAT using paper and pen. If you use the **PEMAT Auto-Scoring Form**, a form that will automatically calculate PEMAT scores once you enter your ratings, you can skip Step 5. The form is available at:

<http://www.ahrq.gov/professionals/prevention-chronic-care/improve/self-mgmt/pemat/index.html>.

**Step 1: Read through the PEMAT and User’s Guide.** Before using the PEMAT, read through the entire User’s Guide and instrument to familiarize yourself with all the items. In the User’s Guide a (P) and (A/V) are listed after an item to indicate whether it is relevant to print and audiovisual materials, respectively.

**Step 2: Read or view patient education material.** Read through or view the patient education material that you are rating in its entirety.

**Step 3: Decide which PEMAT to use.** Choose the PEMAT-P for printable materials or the PEMAT-A/V for audiovisual materials.

**Step 4: Go through each PEMAT item one by one.** All items will have the answer options “Disagree” or “Agree.” Some—but not all—items will also have a “Not Applicable” answer option. Go one by one through each of the items, 24 for printable materials and 17 for audiovisual materials, and indicate if you agree or disagree that the material meets a specific criterion. Or, when appropriate, select the “Not Applicable” option.

You may refer to the material at any time while you complete the form. You don’t have to rely on your memory. Consider each item from a patient perspective. For example, for “Item 1: The material makes its purpose completely evident,” ask yourself, “If I were a patient unfamiliar with the subject, would I readily know what the purpose of the material was?”

**Step 5: Rate the material on each item as you go.** After you determine the rating you would give the material on a specific item, enter the number (or N/A) that corresponds with your answer in the “Rating” column of the PEMAT. Do not score an item as “Not Applicable” unless there is a “Not Applicable” option. Score the material on each item as follows:

|                   |           |
|-------------------|-----------|
| If Disagree       | Enter 0   |
| If Agree          | Enter 1   |
| If Not Applicable | Enter N/A |

---

### Suggested Citation:

Shoemaker SJ, Wolf MS, Brach C. Patient Education Materials Assessment Tool for Printable Materials (PEMAT-P). (Prepared by Abt Associates under Contract No. HHS A290200900012I, TO 4). Rockville, MD: Agency for Healthcare Research and Quality; October 2013. AHRQ Publication No. 14-0002-EF.

### ***Additional Guidance for Rating the Material on Each Item (Step 5)***

- Rate an item “Agree” when a characteristic occurs throughout a material, that is, nearly all of the time (80% to 100%). Your guiding principle is that if there are obvious examples or times when a characteristic could have been met or could have been better met, then the item should be rated “Disagree.” The User’s Guide provides additional guidance for rating each item.
- Do not skip any items. If there is no “Not Applicable” option, you must score the item 0 (Disagree) or 1 (Agree).
- Do not use any knowledge you have about the subject before you read or view the patient education material. Base your ratings ONLY on what is in the material that you are rating.
- Do not let your rating of one item influence your rating of other items. Be careful to rate each item separately and distinctly from how you rated other items.
- If you are rating more than one material, focus only on the material that you are reviewing and do not try to compare it to the previous material that you looked at.

**Step 6: Calculate the material’s scores.** The PEMAT provides two scores for each material—one for understandability and a separate score for actionability. Make sure you have rated the material on every item, including indicating which items are Not Applicable (N/A). Except for Not Applicable (N/A) items, you will have given each item either 1 point (Agree) or 0 points (Disagree). To score the material, do the following:

- ***Sum the total points*** for the material on the understandability items only.
- ***Divide the sum by the total possible points***, that is, the number of items on which the material was rated, excluding the items that were scored Not Applicable (N/A).
- ***Multiply the result by 100*** and you will get a percentage (%). This percentage score is the understandability score on the PEMAT.
  - **Example:** If a print material was rated Agree (1 point) on 12 understandability items, Disagree (0 points) on 3 understandability items, and N/A on one understandability item (N/A), the sum would be 12 points out of 15 total possible points (12 + 3, excluding the N/A item). The PEMAT understandability score is 0.8 (12 divided by 15) multiplied by 100 = 80%.

To score the material on actionability, repeat Step 6 for the actionability items.

**Step 7: Interpret the PEMAT scores.** The higher the score, the more understandable or actionable the material. For example, a material that receives an understandability score of 90% is more understandable than a material that receives an understandability score of 60%, and the same goes for actionability. If you use the PEMAT to rate the understandability and actionability of many materials, you may get a sense of what score indicates exceptionally good or exceptionally poor materials.

Title of Material:

Name of Reviewer:

Review Date:

Read the PEMAT User's Guide (available at: <http://www.ahrq.gov/professionals/prevention-chronic-care/improve/self-mgmt/pemat/>) before rating materials.

## UNDERSTANDABILITY

| Item #                                | Item                                                                                                                           | Response Options                              | Rating |
|---------------------------------------|--------------------------------------------------------------------------------------------------------------------------------|-----------------------------------------------|--------|
| <b>Topic: Content</b>                 |                                                                                                                                |                                               |        |
| 1                                     | The material makes its purpose completely evident.                                                                             | Disagree=0, Agree=1                           |        |
| 2                                     | The material does not include information or content that distracts from its purpose.                                          | Disagree=0, Agree=1                           |        |
| <b>Topic: Word Choice &amp; Style</b> |                                                                                                                                |                                               |        |
| 3                                     | The material uses common, everyday language.                                                                                   | Disagree=0, Agree=1                           |        |
| 4                                     | Medical terms are used only to familiarize audience with the terms. When used, medical terms are defined.                      | Disagree=0, Agree=1                           |        |
| 5                                     | The material uses the active voice.                                                                                            | Disagree=0, Agree=1                           |        |
| <b>Topic: Use of Numbers</b>          |                                                                                                                                |                                               |        |
| 6                                     | Numbers appearing in the material are clear and easy to understand.                                                            | Disagree=0, Agree=1, No numbers=N/A           |        |
| 7                                     | The material does not expect the user to perform calculations.                                                                 | Disagree=0, Agree=1                           |        |
| <b>Topic: Organization</b>            |                                                                                                                                |                                               |        |
| 8                                     | The material breaks or "chunks" information into short sections.                                                               | Disagree=0, Agree=1, Very short material*=N/A |        |
| 9                                     | The material's sections have informative headers.                                                                              | Disagree=0, Agree=1, Very short material*=N/A |        |
| 10                                    | The material presents information in a logical sequence.                                                                       | Disagree=0, Agree=1                           |        |
| 11                                    | The material provides a summary.                                                                                               | Disagree=0, Agree=1, Very short material*=N/A |        |
| <b>Topic: Layout &amp; Design</b>     |                                                                                                                                |                                               |        |
| 12                                    | The material uses visual cues (e.g., arrows, boxes, bullets, bold, larger font, highlighting) to draw attention to key points. | Disagree=0, Agree=1, Video=N/A                |        |

\* A very short print material is defined as a material with two or fewer paragraphs and no more than 1 page in length.

| Item #                           | Item                                                                                                                                | Response Options                           | Rating |
|----------------------------------|-------------------------------------------------------------------------------------------------------------------------------------|--------------------------------------------|--------|
| <b>Topic: Use of Visual Aids</b> |                                                                                                                                     |                                            |        |
| 15                               | The material uses visual aids whenever they could make content more easily understood (e.g., illustration of healthy portion size). | Disagree=0, Agree=1                        |        |
| 16                               | The material's visual aids reinforce rather than distract from the content.                                                         | Disagree=0, Agree=1,<br>No visual aids=N/A |        |
| 17                               | The material's visual aids have clear titles or captions.                                                                           | Disagree=0, Agree=1,<br>No visual aids=N/A |        |
| 18                               | The material uses illustrations and photographs that are clear and uncluttered.                                                     | Disagree=0, Agree=1,<br>No visual aids=N/A |        |
| 19                               | The material uses simple tables with short and clear row and column headings.                                                       | Disagree=0, Agree=1,<br>No tables=N/A      |        |

**Total Points:** \_\_\_\_\_

**Total Possible Points:** \_\_\_\_\_

**Understandability Score (%):** \_\_\_\_\_

*(Total Points / Total Possible Points) × 100*

## **ACTIONABILITY**

| Item # | Item                                                                                                                 | Response Options                                                         | Rating |
|--------|----------------------------------------------------------------------------------------------------------------------|--------------------------------------------------------------------------|--------|
| 20     | The material clearly identifies at least one action the user can take.                                               | Disagree=0, Agree=1                                                      |        |
| 21     | The material addresses the user directly when describing actions.                                                    | Disagree=0, Agree=1                                                      |        |
| 22     | The material breaks down any action into manageable, explicit steps.                                                 | Disagree=0, Agree=1                                                      |        |
| 23     | The material provides a tangible tool (e.g., menu planners, checklists) whenever it could help the user take action. | Disagree=0, Agree=1                                                      |        |
| 24     | The material provides simple instructions or examples of how to perform calculations.                                | Disagree=0, Agree=1,<br>No calculations=NA                               |        |
| 25     | The material explains how to use the charts, graphs, tables, or diagrams to take actions.                            | Disagree=0, Agree=1,<br>No charts, graphs,<br>tables, or<br>diagrams=N/A |        |
| 26     | The material uses visual aids whenever they could make it easier to act on the instructions.                         | Disagree=0, Agree=1                                                      |        |

**Total Points:** \_\_\_\_\_

**Total Possible Points:** \_\_\_\_\_

**Actionability Score (%):** \_\_\_\_\_

*(Total Points / Total Possible Points) × 100*

# Patient Education Materials Assessment Tool for Audiovisual Materials (PEMAT-A/V)

## How To Use the PEMAT To Assess a Material

There are seven steps to using the PEMAT to assess a patient education material. The instructions below assume that you will score the PEMAT using paper and pen. If you use the **PEMAT Auto-Scoring Form**, a form that will automatically calculate PEMAT scores once you enter your ratings, you can skip Step 5. The form is available at:

<http://www.ahrq.gov/professionals/prevention-chronic-care/improve/self-mgmt/pemat/index.html>.

**Step 1: Read through the PEMAT and User’s Guide.** Before using the PEMAT, read through the entire User’s Guide and instrument to familiarize yourself with all the items. In the User’s Guide a (P) and (A/V) are listed after an item to indicate whether it is relevant for print and audiovisual materials, respectively.

**Step 2: Read or view patient education material.** Read through or view the patient education material that you are rating in its entirety.

**Step 3: Decide which PEMAT to use.** Choose the PEMAT-P for printable materials or the PEMAT-A/V for audiovisual materials.

**Step 4: Go through each PEMAT item one by one.** All items will have the answer options “Disagree” or “Agree.” Some—but not all—items will also have a “Not Applicable” answer option. Go one by one through each of the items, 24 for printable materials and 17 for audiovisual materials, and indicate if you agree or disagree that the material is meeting a specific criterion. Or, when appropriate, select the “Not Applicable” option.

You may refer to the material at any time while you complete the form. You don’t have to rely on your memory. Consider each item from a patient perspective. For example, for “Item 1: The material makes its purpose completely evident,” ask yourself, “If I were a patient unfamiliar with the subject, would I readily know what the purpose of the material was?”

**Step 5: Rate the material on each item as you go.** After you determine the rating you would give the material on a specific item, enter the number (or N/A) that corresponds with your answer in the “Rating” column of the PEMAT. Do not score an item as “Not Applicable” unless there is a “Not Applicable” option. Score the material on each item as follows:

|                   |          |
|-------------------|----------|
| If Disagree       | Enter 0  |
| If Agree          | Enter 1  |
| If Not Applicable | Enter NA |

---

### Suggested Citation:

Shoemaker SJ, Wolf MS, Brach C. Patient Education Materials Assessment Tool for Audiovisual Materials (PEMAT-A/V). (Prepared by Abt Associates, under Contract No. HHS A2902009000121, TO 4). Rockville, MD: Agency for Healthcare Research and Quality; October 2013. AHRQ Publication No. 14-0002-EF.

### ***Additional Guidance for Rating the Material on Each Item (Step 5):***

- Rate an item “Agree” when a characteristic occurs throughout a material, that is, nearly all of the time (80% to 100%). Your guiding principle is that if there are obvious examples or times when a characteristic could have been met or could have been better met, then the item should be rated “Disagree.” The User’s Guide provides additional guidance for rating each item.
- Do not skip any items. If there is no “Not Applicable” option, you must score the item 0 (Disagree) or 1 (Agree).
- Do not use any knowledge you have about the subject before you read or view the patient education material. Base your ratings **ONLY** on what is in the material that you are rating.
- Do not let your rating of one item influence your rating of other items. Be careful to rate each item separately and distinctly from how you rated other items.
- If you are rating more than one material, focus only on the material that you are reviewing and do not try to compare it to the previous material that you looked at.

**Step 6: Calculate the material’s scores.** The PEMAT provides two scores for each material—one for understandability and a separate score for actionability. Make sure you have rated the material on every item, including indicating which items are Not Applicable (N/A). Except for Not Applicable (N/A) items, you will have given each item either 1 point (Agree), or 0 points (Disagree). To score the material, do the following:

- ***Sum the total points*** for the material on the understandability items only.
- ***Divide the sum by the total possible points***, that is, the number of items on which the material was rated, excluding the items that were scored Not Applicable (N/A).
- ***Multiply the result by 100*** and you will get a percentage (%). This percentage score is the understandability score on the PEMAT.
  - **Example:** If a print material was rated Agree (1 point) on 12 understandability items, Disagree (0 points) on 3 understandability items, and N/A on one understandability item (N/A), the sum would be 12 points out of 15 total possible points (12 + 3, excluding the N/A item). The PEMAT understandability score is 0.8 (12 divided by 15) multiplied by 100 = 80%.

To score the material on actionability, repeat Step 6 for the actionability items.

**Step 7: Interpret the PEMAT scores.** The higher the score, the more understandable or actionable the material. For example, a material that receives an understandability score of 90% is more understandable than a material that receives an understandability score of 60%, and the same goes for actionability. If you use the PEMAT to rate the understandability and actionability of many materials, you may get a sense of what score indicates exceptionally good or exceptionally poor materials.

Title of Material:

Name of Reviewer:

Review Date:

Read the PEMAT User's Guide (available at: <http://www.ahrq.gov/professionals/prevention-chronic-care/improve/self-mgmt/pemat/>) before rating materials.

## UNDERSTANDABILITY

| Item #                                | Item                                                                                                                           | Response Options                                           | Rating |
|---------------------------------------|--------------------------------------------------------------------------------------------------------------------------------|------------------------------------------------------------|--------|
| <b>Topic: Content</b>                 |                                                                                                                                |                                                            |        |
| 1                                     | The material makes its purpose completely evident.                                                                             | Disagree=0, Agree=1                                        |        |
| <b>Topic: Word Choice &amp; Style</b> |                                                                                                                                |                                                            |        |
| 3                                     | The material uses common, everyday language.                                                                                   | Disagree=0, Agree=1                                        |        |
| 4                                     | Medical terms are used only to familiarize audience with the terms. When used, medical terms are defined.                      | Disagree=0, Agree=1                                        |        |
| 5                                     | The material uses the active voice.                                                                                            | Disagree=0, Agree=1                                        |        |
| <b>Topic: Organization</b>            |                                                                                                                                |                                                            |        |
| 8                                     | The material breaks or “chunks” information into short sections.                                                               | Disagree=0, Agree=1, Very short material <sup>1</sup> =N/A |        |
| 9                                     | The material's sections have informative headers.                                                                              | Disagree=0, Agree=1, Very short material <sup>*</sup> =N/A |        |
| 10                                    | The material presents information in a logical sequence.                                                                       | Disagree=0, Agree=1                                        |        |
| 11                                    | The material provides a summary.                                                                                               | Disagree=0, Agree=1, Very short material <sup>*</sup> =N/A |        |
| <b>Topic: Layout &amp; Design</b>     |                                                                                                                                |                                                            |        |
| 12                                    | The material uses visual cues (e.g., arrows, boxes, bullets, bold, larger font, highlighting) to draw attention to key points. | Disagree=0, Agree=1, Video=N/A                             |        |
| 13                                    | Text on the screen is easy to read.                                                                                            | Disagree=0, Agree=1, No text or all text is narrated=N/A   |        |
| 14                                    | The material allows the user to hear the words clearly (e.g., not too fast, not garbled).                                      | Disagree=0, Agree=1, No narration=N/A                      |        |

<sup>1</sup> A very short audiovisual material is defined as a video or multimedia presentation that is under 1 minute, or a multimedia material that has 6 or fewer slides or screenshots.

| Item #                           | Item                                                                            | Response Options                           | Rating |
|----------------------------------|---------------------------------------------------------------------------------|--------------------------------------------|--------|
| <b>Topic: Use of Visual Aids</b> |                                                                                 |                                            |        |
| 18                               | The material uses illustrations and photographs that are clear and uncluttered. | Disagree=0, Agree=1,<br>No visual aids=N/A |        |
| 19                               | The material uses simple tables with short and clear row and column headings.   | Disagree=0, Agree=1,<br>No tables=N/A      |        |

**Total Points:** \_\_\_\_\_

**Total Possible Points:** \_\_\_\_\_

**Understandability Score (%):** \_\_\_\_\_

*(Total Points / Total Possible Points × 100)*

## ACTIONABILITY

| Item # | Item                                                                                      | Response Options                                                   | Rating |
|--------|-------------------------------------------------------------------------------------------|--------------------------------------------------------------------|--------|
| 20     | The material clearly identifies at least one action the user can take.                    | Disagree=0, Agree=1                                                |        |
| 21     | The material addresses the user directly when describing actions.                         | Disagree=0, Agree=1                                                |        |
| 22     | The material breaks down any action into manageable, explicit steps.                      | Disagree=0, Agree=1                                                |        |
| 25     | The material explains how to use the charts, graphs, tables, or diagrams to take actions. | Disagree=0, Agree=1,<br>No charts, graphs, tables,<br>diagrams=N/A |        |

**Total Points:** \_\_\_\_\_

**Total Possible Points:** \_\_\_\_\_

**Actionability Score (%):** \_\_\_\_\_

*(Total Points / Total Possible Points × 100)*
