# Supplementary material
Source: PubMed Central journal article supplement (PMC10230510)
Supplement: NIHMS1894177-supplement-Appendix_2.pdf [file NIHMS1894177-supplement-Appendix_2.pdf]

|                            |                                                                                                                                | UM -<br>Abdominoplasty | UM -<br>Brachioplasty | UM - Breast<br>Reduc | UM - Pan | ASPS -<br>Abdominoplasty | ASPS -<br>Brachioplasty | ASPS - breast<br>reduc | ASPS -<br>mastopexy | ASPS -<br>panni | ASPS -<br>thighplasty |
|----------------------------|--------------------------------------------------------------------------------------------------------------------------------|------------------------|-----------------------|----------------------|----------|--------------------------|-------------------------|------------------------|---------------------|-----------------|-----------------------|
| <b>Understanding</b>       |                                                                                                                                |                        |                       |                      |          |                          |                         |                        |                     |                 |                       |
| <b>Content</b>             | The material makes its purpose completely evident                                                                              | 1                      | 1                     | 1                    | 1        | 1                        | 1                       | 1                      | 1                   | 1               | 1                     |
|                            | The material does not include information or content that distracts from its purpose                                           | 1                      | 1                     | 1                    | 1        | 1                        | 1                       | 1                      | 1                   | 1               | 1                     |
| <b>Word Choice/Style</b>   | Common, everyday language                                                                                                      | 1                      | 1                     | 1                    | 1        | 1                        | 1                       | 1                      | 1                   | 1               | 1                     |
|                            | Medical terms are used only to familiarize audience with the terms. When used, medical terms are defined                       | 0                      | 1                     | 0                    | 1        | 1                        | 1                       | 1                      | 1                   | 1               | 1                     |
|                            | Material uses the active voice                                                                                                 | 1                      | 1                     | 1                    | 1        | 1                        | 1                       | 1                      | 1                   | 1               | 1                     |
| <b>Use of numbers</b>      | Numbers appearing in material are clear and easy to understand                                                                 | 1                      | 1                     | 1                    | 1        | 1                        | 1                       | 1                      | 1                   | 1               | 1                     |
|                            | Material does not expect the user to perform calculations                                                                      | 1                      | 1                     | 1                    | 1        | 1                        | 1                       | 1                      | 1                   | 1               | 1                     |
| <b>Organization</b>        | Material breaks or chunks information into short sections                                                                      | 1                      | 1                     | 1                    | 1        | 1                        | 1                       | 1                      | 1                   | 1               | 1                     |
|                            | Material's sections have informative headers                                                                                   | 1                      | 1                     | 1                    | 1        | 1                        | 1                       | 1                      | 1                   | 1               | 1                     |
|                            | Material presents information in a logical sequence                                                                            | 0                      | 1                     | 1                    | 0        | 1                        | 1                       | 1                      | 1                   | 1               | 1                     |
|                            | Material provides a summary                                                                                                    | 0                      | 0                     | 0                    | 0        | 0                        | 0                       | 0                      | 0                   | 0               | 0                     |
| <b>Layout &amp; Design</b> | Material uses visual cues to draw attention to key points                                                                      | 0                      | 0                     | 0                    | 0        | 1                        | 1                       | 1                      | 1                   | 0               | 0                     |
| <b>Use of visual aids</b>  | Material uses visual aids whenever they could make content more easily understood (e.g., illustration of healthy portion size) | 0                      | 0                     | 0                    | 0        | 1                        | 1                       | 1                      | 1                   | 0               | 0                     |
|                            | Visual aids reinforce rather than distract from content                                                                        | -                      | -                     | -                    | -        | 1                        | 1                       | 1                      | 1                   | -               | -                     |
|                            | Clear titles or captions for visual aids                                                                                       | -                      | -                     | -                    | -        | 0                        | 0                       | 0                      | 0                   | -               | -                     |
|                            | Material uses illustrations and photographs that are clear and uncluttered                                                     | -                      | -                     | -                    | -        | 1                        | 1                       | 1                      | 1                   | -               | -                     |
|                            | Material uses simple tables w/ short and clear row and column headings                                                         | -                      | -                     | -                    | -        | -                        | -                       | -                      | -                   | -               | -                     |
|                            | <b>Score</b>                                                                                                                   | 8                      | 10                    | 9                    | 9        | 14                       | 14                      | 14                     | 14                  | 10              | 10                    |
|                            | <b>Percentage</b>                                                                                                              | 61.54                  | 76.92                 | 69.23                | 69.23    | 87.50                    | 87.50                   | 87.50                  | 87.50               | 76.92           | 76.92                 |
| <b>Accountability</b>      |                                                                                                                                |                        |                       |                      |          |                          |                         |                        |                     |                 |                       |
|                            | Material clearly identifies at least one action the user can take                                                              | 1                      | 1                     | 1                    | 1        | 1                        | 1                       | 1                      | 1                   | 1               | 1                     |
|                            | The material addresses the user directly when describing actions                                                               | 1                      | 1                     | 1                    | 1        | 1                        | 1                       | 1                      | 1                   | 1               | 1                     |
|                            | The material breaks down steps explicitly                                                                                      | 1                      | 1                     | 1                    | 1        | 0                        | 0                       | 0                      | 0                   | 0               | 0                     |
|                            | The material provides a tangible tool (menu planner, checklists) whenever it could to help user take action                    | 0                      | 0                     | 0                    | 0        | 0                        | 0                       | 0                      | 0                   | 0               | 0                     |
|                            | Material provides simple instructions or examples of how to perform calculations                                               | -                      | -                     | -                    | -        | -                        | -                       | -                      | -                   | -               | -                     |
|                            | The material explains how to use charts, graphs, tables, or diagrams to take actions                                           | -                      | -                     | -                    | -        | -                        | -                       | -                      | -                   | -               | -                     |
|                            | The material uses visual aids whenever they could to make it easier to act on the instructions                                 | 0                      | 0                     | 0                    | 0        | 0                        | 0                       | 0                      | 0                   | 0               | 0                     |
|                            | <b>Score</b>                                                                                                                   | 3                      | 3                     | 3                    | 3        | 2                        | 2                       | 2                      | 2                   | 2               | 2                     |
|                            | <b>Percentage</b>                                                                                                              | 60                     | 60                    | 60                   | 60       | 40                       | 40                      | 40                     | 40                  | 40              | 40                    |

1 = agree  
0 = disagree

N/A = NA (available for grey boxes)
